# Supplementary material for: The Control of Diagenesis and Mineral Assemblages on Brittleness of Mudstones
Source: Frontiers journal article supplement (doi:10.3389/feart.2021.758046), 2021-12-23
Supplement: Data_Sheet_1.DOCX [file Data_Sheet_1.DOCX]

**Supplementary materials**

**The control of diagenesis and mineral assemblages on brittleness of mudstones**

Jiazong Dua,b, Jingong Caib, *, Shengxiang Longa, Bo Gaoa, Dongjun Fenga, Zeyang Penga, Xiang Zengb

a. State Key Laboratory of Shale Oil and Gas Enrichment Mechanisms and Effective Development，SINOPEC, 100089, Beijing, China;

b. School of Ocean and Earth Science, Tongji University, 200092, Shanghai, China.

*Corresponding author

Phone: +86-21-65988829

Fax: +86-21-65988829

E-mail: [jgcai@tongji.edu.cn](mailto:jgcai@tongji.edu.cn)

#
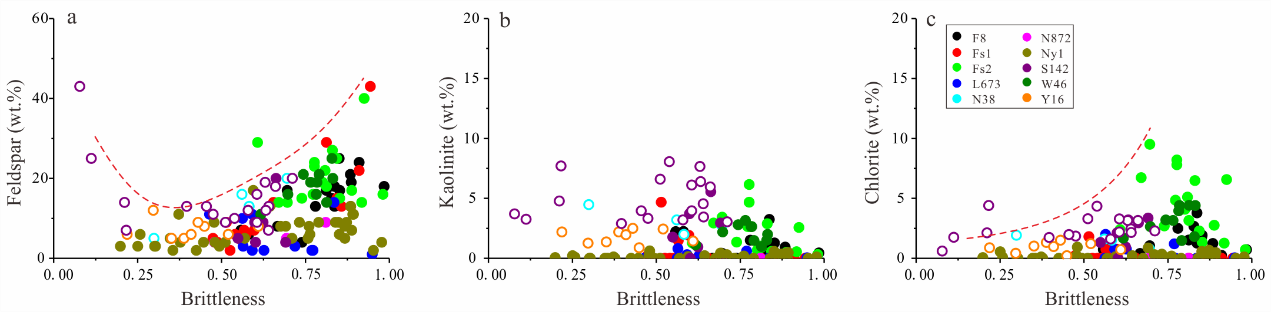


Figure S1 Correlations of BEI with feldspar (a), kaolinite (b), and chlorite (c) (circle: samples in early diagenesis stage; solid circle: samples in late diagenesis stage).
